# Supplementary material for: Regulated delivery controls Drosophila Hedgehog, Wingless, and Decapentaplegic signaling
Source: eLife journal article supplement (doi:10.7554/elife.71744), 2021-07-22
Supplement: supp [file elife-71744-supp-v1.zip]

Figure 2, Supplement3

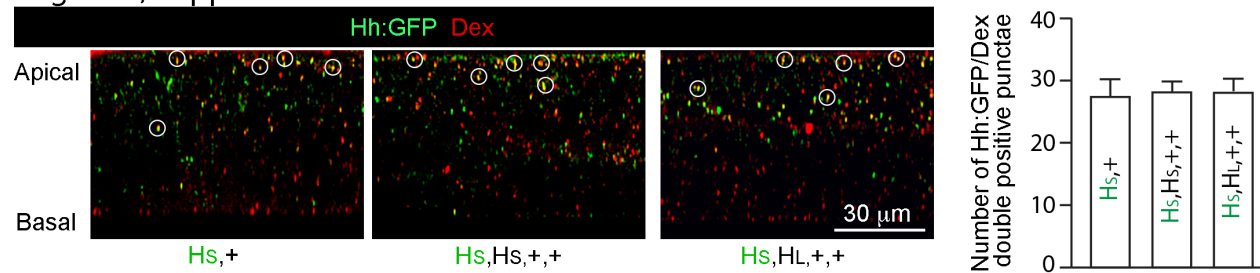

**Figure 2-figure supplement 3. Dextran uptake in *hh* gene copy number genotypes** Sagittal images from optical sections of wing discs with one *Hh:GFP* gene together with one, or three *hh* genes, following incubation with Red Dextran (MW 3000) and staining with  $\alpha$ -GFP antibody. White circles indicate colocalization. Graph shows number of *Hh:GFP*/Dextran double positive punctae for indicated genotypes.
