# Supplementary material for: Regulated delivery controls Drosophila Hedgehog, Wingless, and Decapentaplegic signaling
Source: eLife journal article supplement (doi:10.7554/elife.71744), 2021-07-22
Supplement: supp [file elife-71744-supp-v1.zip]

## Figure 1, Supplement4

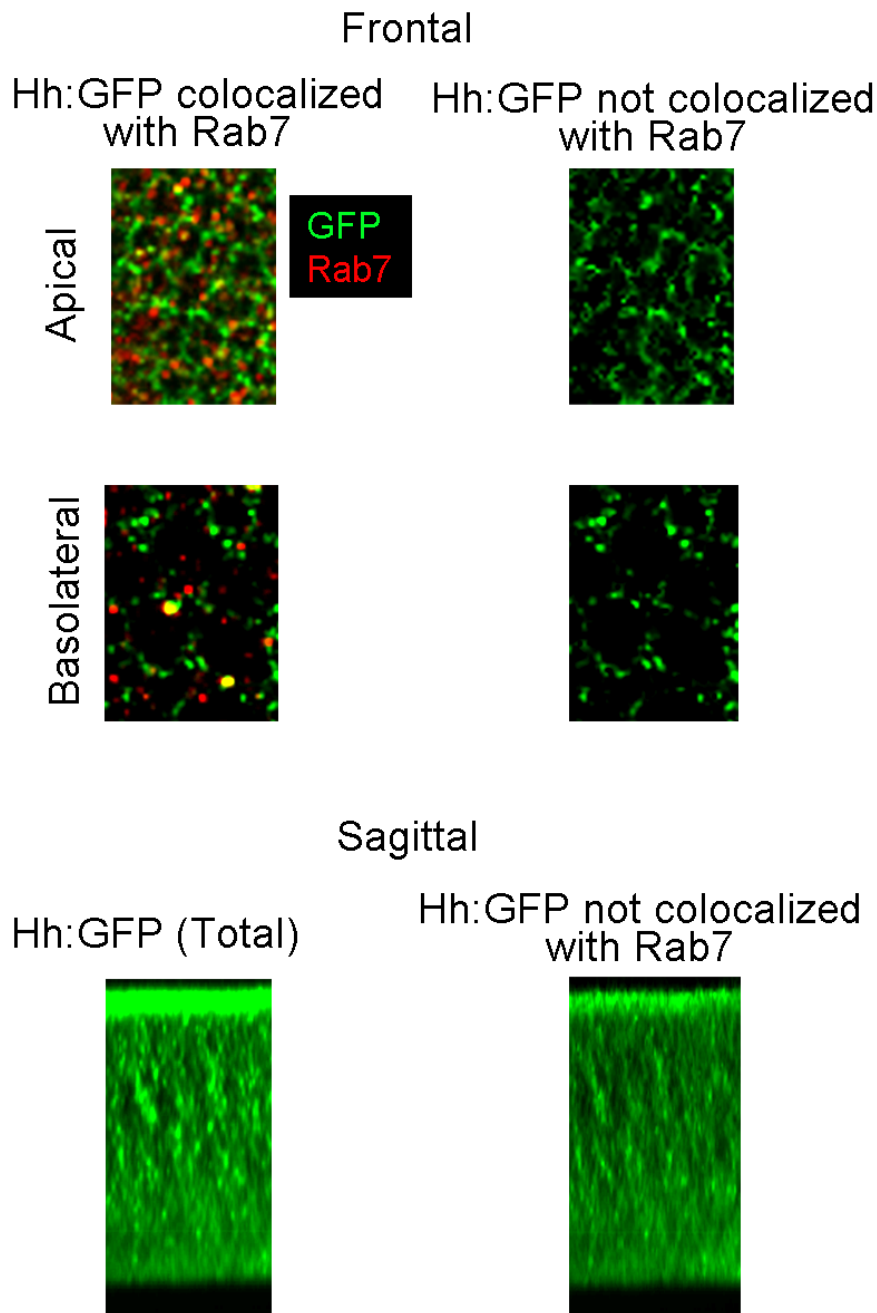

**Figure 1-figure supplement 4. Colocalization of Hh and Rab7 in the wing imaginal disc.**

Wing discs (Hh:GFP/+) were stained with  $\alpha$ -GFP and  $\alpha$ -Rab7 antibodies; frontal images from apical and basal optical sections (upper panels) shown with both  $\alpha$ -GFP and  $\alpha$ -Rab7 staining (left panels) and after removal of pixels with both red and green fluorescence using ImageJ. Bottom panels show images of sagittal projects of staining of Hh:GFP before (left) and after (right) removal of pixels with both red and green fluorescence using ImageJ
