# Supplementary material for: Regulated delivery controls Drosophila Hedgehog, Wingless, and Decapentaplegic signaling
Source: eLife journal article supplement (doi:10.7554/elife.71744), 2021-07-22
Supplement: supp [file elife-71744-supp-v1.zip]

Figure 7, Supplement1

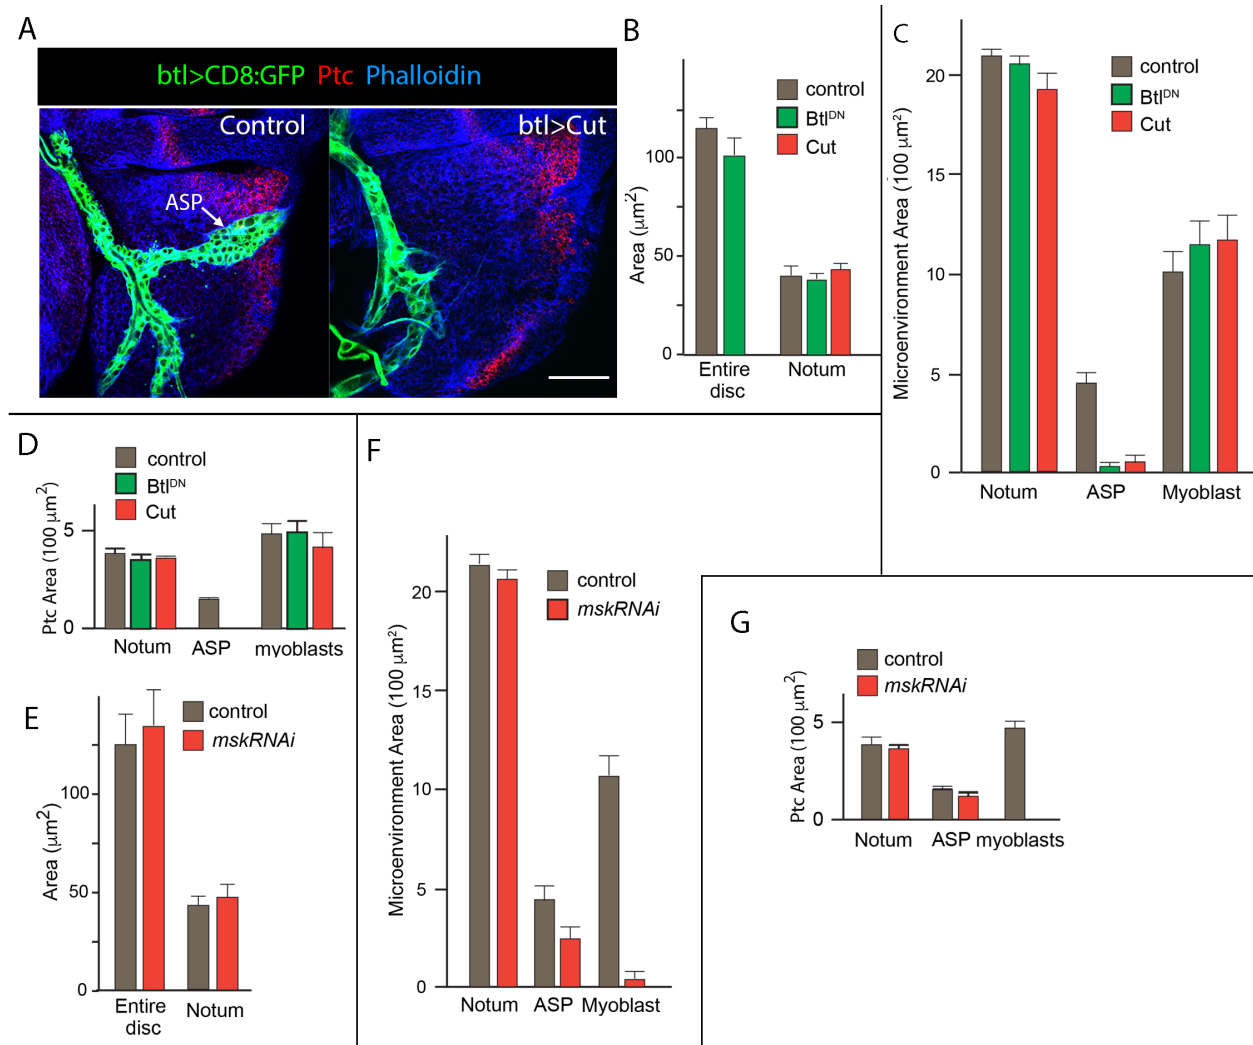

**Figure 7-figure supplement 1. Unchanged size of wing disc with ablation of ASP or myoblasts** (A) Notum primordium stained with  $\alpha$ -Ptc antibody (red) and phalloidin (blue), with trachea and ASP marked by CD8:GFP (green) driven by *btl-Gal4*; control genotype (WT), ASP ablation genotype (*btl-Gal4>Cut*). Scale bar: 50  $\mu\text{m}$ . (B) Bar graph quantifying the size of the entire wing disc and notum primordium in control genotype (*btl-Gal4* / +) and in ASP ablation genotypes (*btl>Btl<sup>DN</sup>* and *btl>Cut*). Units for the area are in  $100 \mu\text{m}^2$ . Differences not statistically significant (student's t-test  $P > 0.05$ ). (C) Same as (B) but comparing microenvironment size in control (*btl-Gal4* / +) and myoblast ablation (*btl>mskRNAi*) genotypes. Notum and myoblast size differences not statistically significant (student's t-test  $P > 0.05$ ); ASP size differences are statistically significant (student's t-test ( $P < 0.05$ )). (D) Comparison of area of Ptc expression in

control and ASP ablation genotypes. Notum size differences not statistically significant (student's t-test  $P>0.05$ ); ASP and myoblast size differences are statistically significant (student's t-test ( $P<0.05$ )). (E) Comparison of size of entire disc and notum in control and myoblast ablation genotypes. Differences not statistically significant (student's t-test  $P>0.05$ ) (F) Comparison of size of microenvironment in control and myoblast ablation genotypes. Differences in the area of Ptc expression in the Notum not statistically significant. (G) Comparison of area of Ptc expression in control and myoblast ablation genotypes. Differences in the area of Ptc expression in the Notum and ASP not statistically significant.
