# Supplementary material for: Regulated delivery controls Drosophila Hedgehog, Wingless, and Decapentaplegic signaling
Source: eLife journal article supplement (doi:10.7554/elife.71744), 2021-07-22
Supplement: supp [file elife-71744-supp-v1.zip]

Figure 3

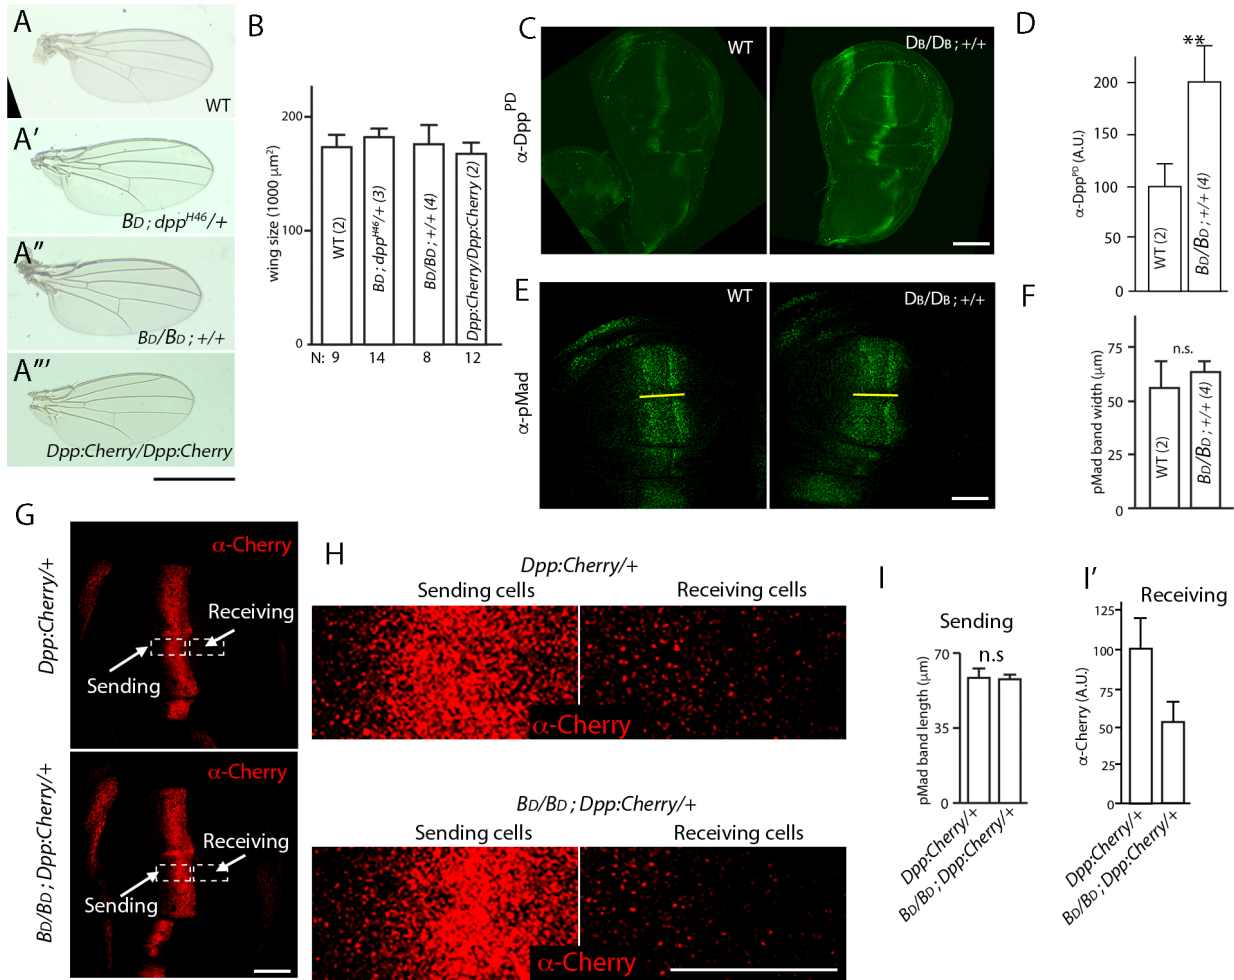

**Figure 1-figure supplement 3. Knot expression in *hh* gene copy number genotypes** Images from wing discs stained with  $\alpha$ -Knot antibody. Anterior, left; posterior, right. Numbers indicate gene copy number. Bar graph shows average width of the Kn band, which is not statistically significant different in the genotypes. N=8-10
