# Supplementary material for: Regulated delivery controls Drosophila Hedgehog, Wingless, and Decapentaplegic signaling
Source: eLife journal article supplement (doi:10.7554/elife.71744), 2021-07-22
Supplement: supp [file elife-71744-supp-v1.zip]

Figure 2, Supplement2

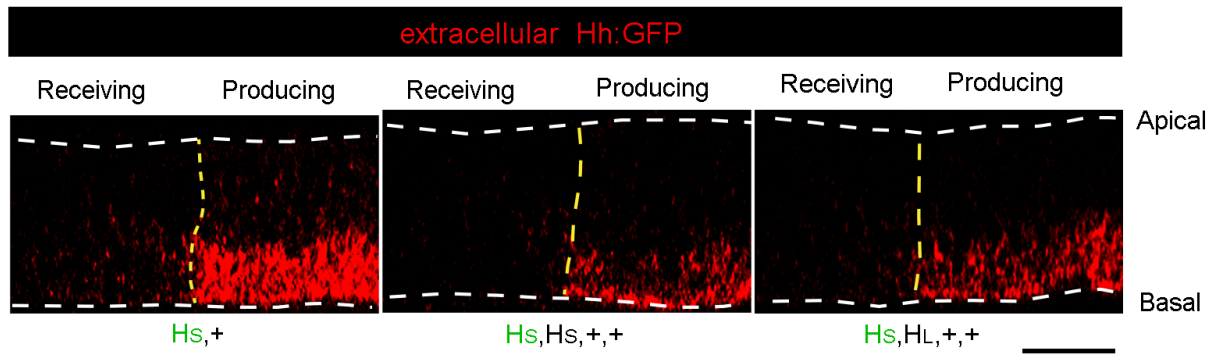

**Figure 2-figure supplement 2. Distributions of extracellular Hh in *hh* gene copy number genotypes** Sagittal images from optical sections of wing discs with one Hh:GFP gene together with one, or three *hh* genes. Discs were stained with  $\alpha$ -GFP antibody. Anterior, left; posterior, right. Yellow dashed line indicate approximate location of A/P compartment borders; white dashed lines indicate locations of apical (top) and basal (bottom) membranes. Scale bar: 25  $\mu$ m
