# Supplementary material for: Regulated delivery controls Drosophila Hedgehog, Wingless, and Decapentaplegic signaling
Source: eLife journal article supplement (doi:10.7554/elife.71744), 2021-07-22
Supplement: supp [file elife-71744-supp-v1.zip]

Figure 4 supplement 1

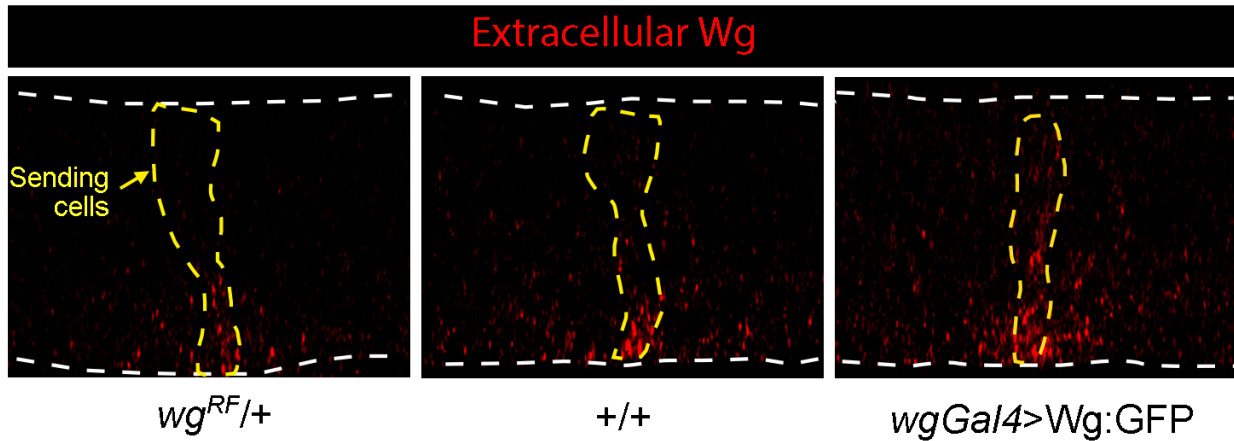

**Figure 4-figure supplement 1 Dll expression in *hh* gene copy number genotypes** (A) Images of wing discs stained with  $\alpha$ -Dll antibody. Anterior, left; posterior, right; dorsal down. (B) Schematic showing location of region analyzed for fluorescence intensity. (C) Fluorescence intensity profiles for the genotypes with 1 ( $wg^{RF}/+$ ), 2 ( $+/+$ ), and transgene ( $wgGal4>Wg:GFP$ ) *wg* genes. N=5-7
