# Supplementary material for: Regulated delivery controls Drosophila Hedgehog, Wingless, and Decapentaplegic signaling
Source: eLife journal article supplement (doi:10.7554/elife.71744), 2021-07-22
Supplement: supp [file elife-71744-supp-v1.zip]

Figure 2, Supplement1

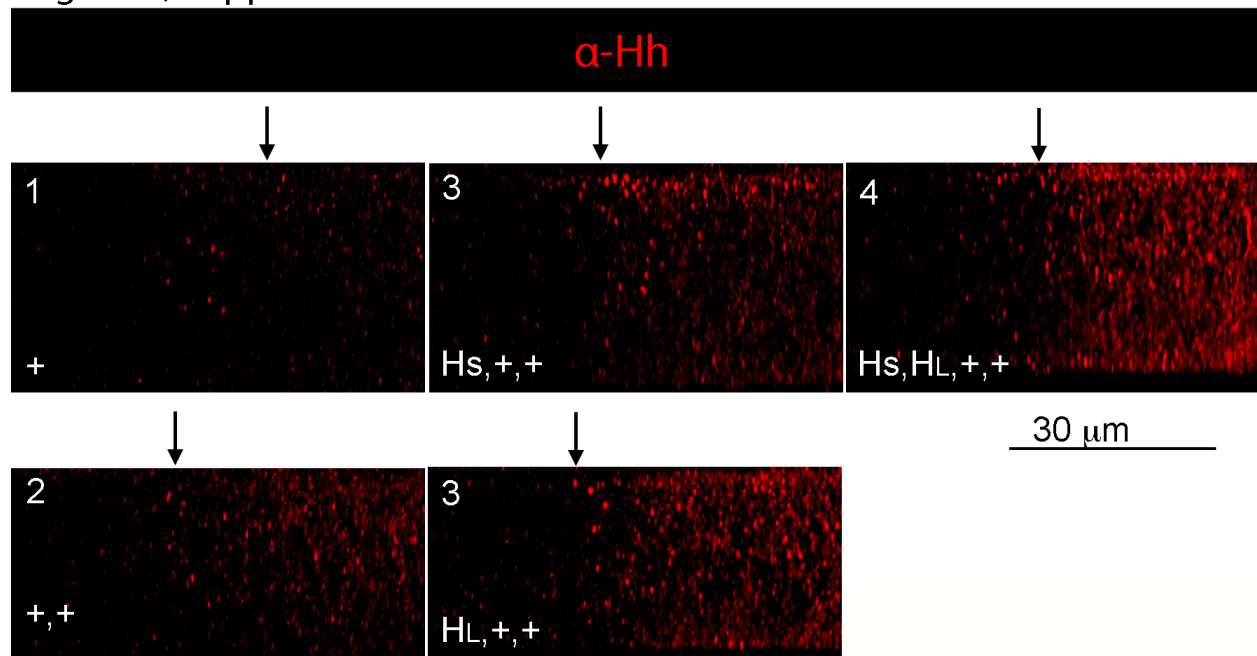

**Figure 2-figure supplement 1. Apical/basal distributions of Hh in *hh* gene copy number genotypes** Sagittal images from optical sections of wing discs stained with  $\alpha$ -Hh antibody. Anterior, left; posterior, right. Arrows indicate approximate location of A/P compartment borders.
