# Supplementary material for: Regulated delivery controls Drosophila Hedgehog, Wingless, and Decapentaplegic signaling
Source: eLife journal article supplement (doi:10.7554/elife.71744), 2021-07-22
Supplement: supp [file elife-71744-supp-v1.zip]

Figure 1, Supplement1

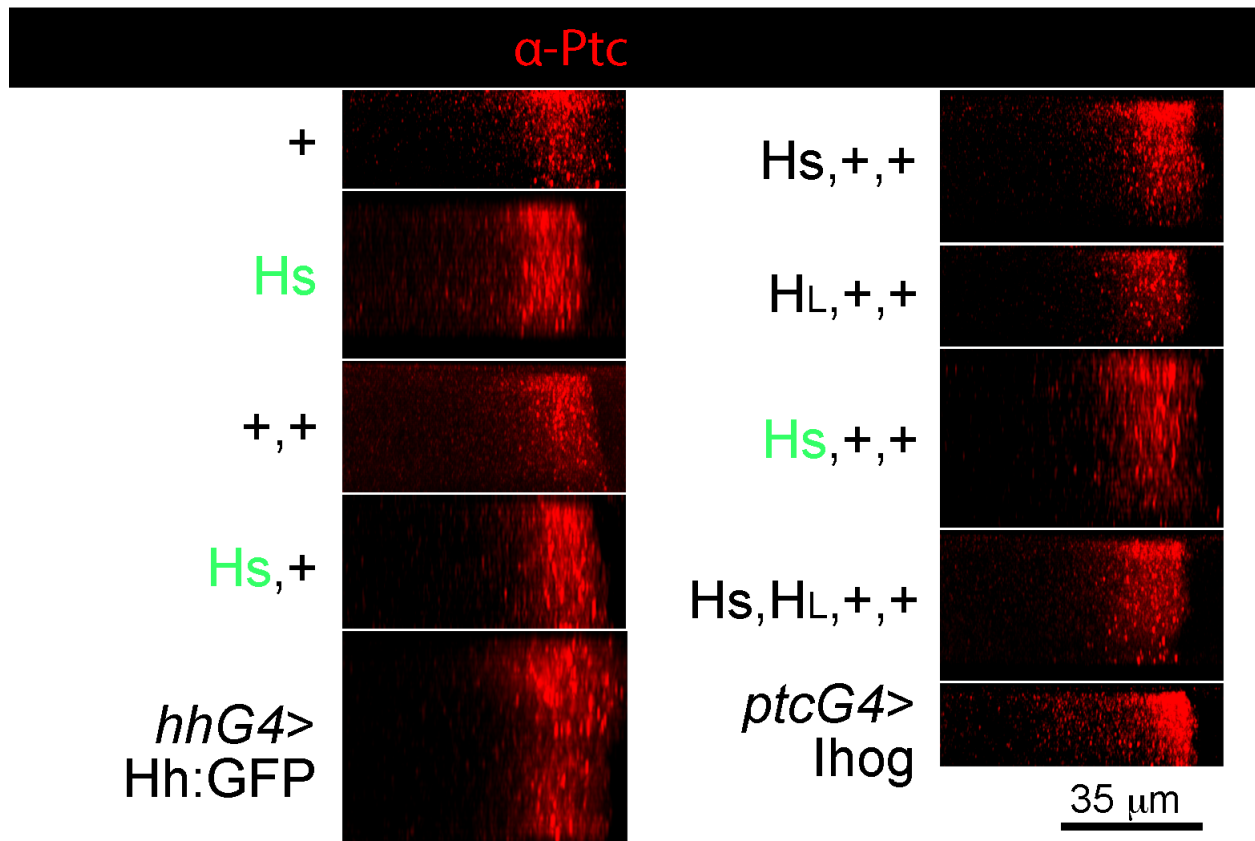

**Figure 1-figure supplement 1. Apical/basal distributions of Ptc in *hh* gene copy number genotypes** Panels show representative maximum projection compilations of multiple cross sections of wing discs stained with  $\alpha$ -Ptc antibody. Anterior, left; posterior, right; apical, up; basal, down. Width of Ptc stripe unchanged except for *ptcGal4>lhog* (elevated A compartment staining) and *hhGal4>Hh:GFP* (thicker disc).
