# Supplementary material for: Regulated delivery controls Drosophila Hedgehog, Wingless, and Decapentaplegic signaling
Source: eLife journal article supplement (doi:10.7554/elife.71744), 2021-07-22
Supplement: supp [file elife-71744-supp-v1.zip]

## Figure 3, Supplement1

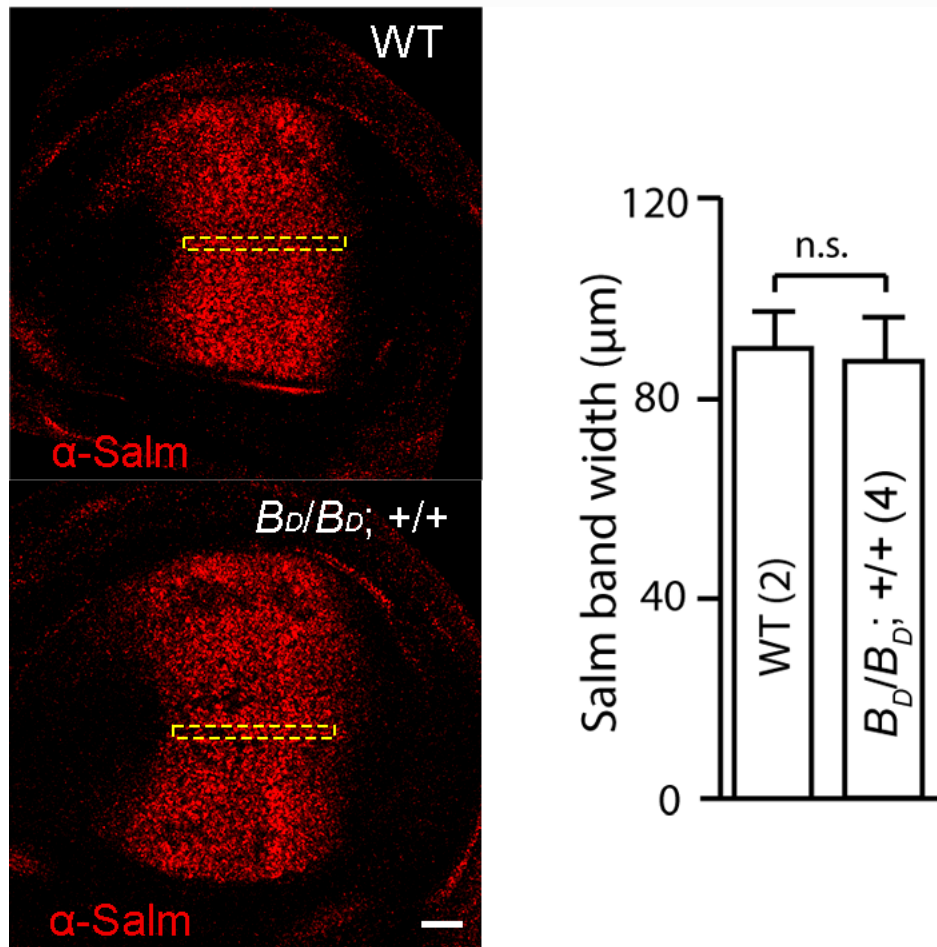

**Figure 3-figure supplement 1. Salm expression in *dpp* gene copy number genotypes** Images of wing discs stained with  $\alpha$ -Salm antibody. Anterior, left; posterior, right. Bar graph shows average width of the Salm band measured in the dashed yellow lined box, which is not statistically significant different in the genotypes with 2 (WT) and 4 ( $B_D/B_D; +/+$ ) *dpp* gene copies. N=8. Scale bar: 20  $\mu\text{m}$
