# Supplementary material for: Regulated delivery controls Drosophila Hedgehog, Wingless, and Decapentaplegic signaling
Source: eLife journal article supplement (doi:10.7554/elife.71744), 2021-07-22
Supplement: supp [file elife-71744-supp-v1.zip]

Figure 1, Supplement2

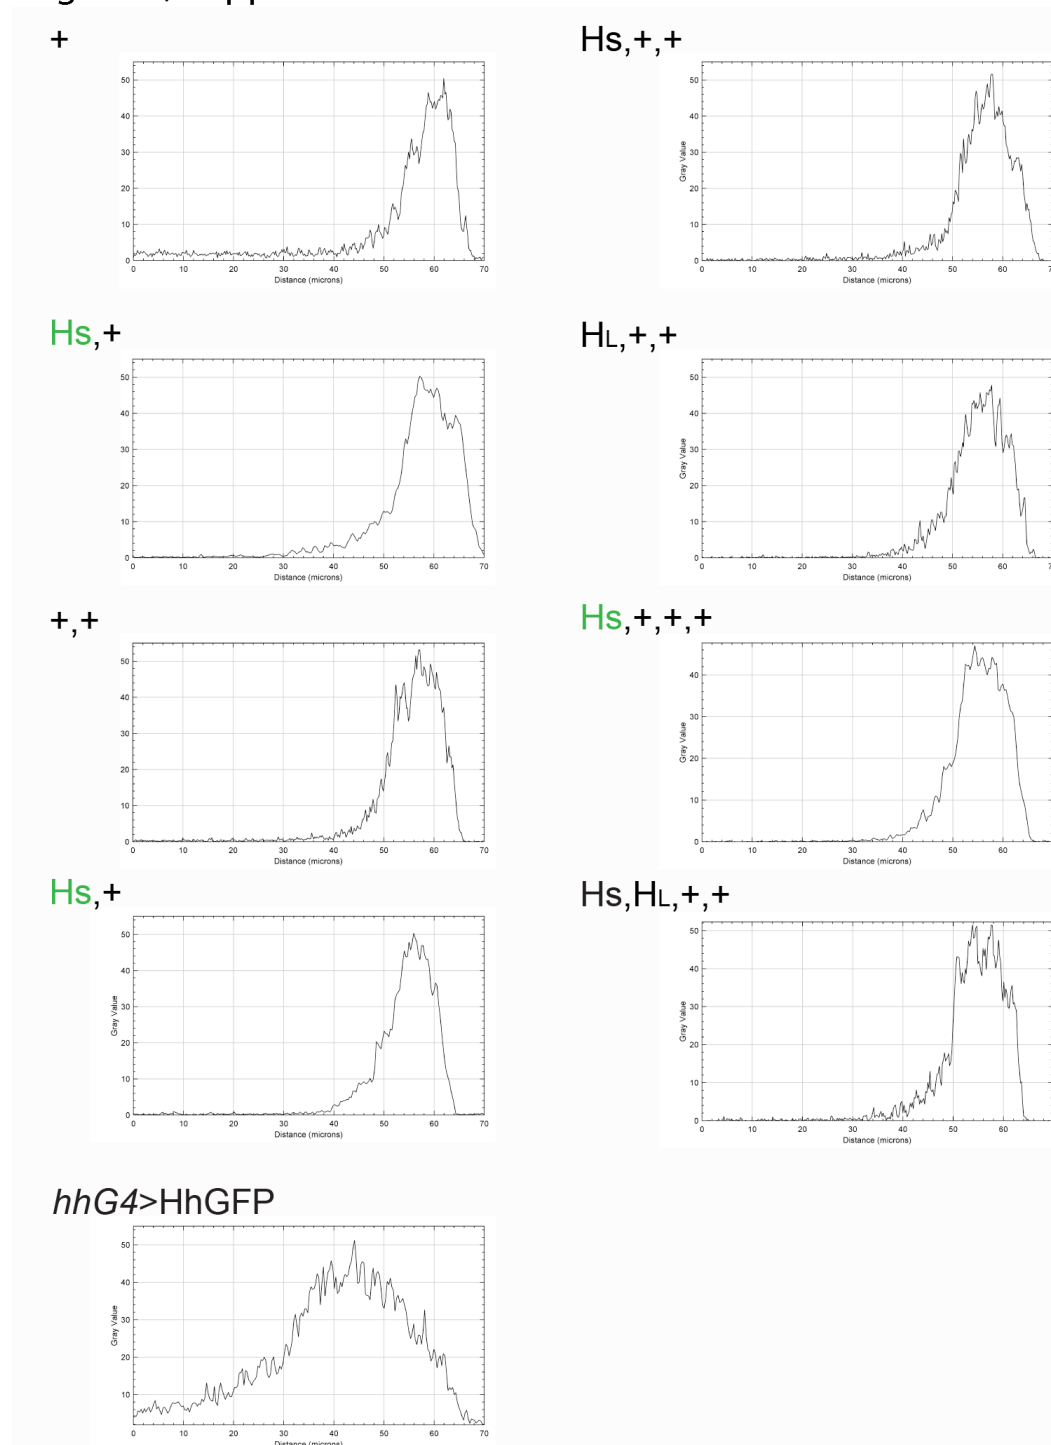

**Figure 1-figure supplement 2. Intensity profiles of Ptc expression in *hh* gene copy number genotypes** Representative profiles of bands of Ptc expression in Figure 1D.
