# Supplementary material for: Regulated delivery controls Drosophila Hedgehog, Wingless, and Decapentaplegic signaling
Source: eLife journal article supplement (doi:10.7554/elife.71744), 2021-07-22
Supplement: supp [file elife-71744-supp-v1.zip]

Archive with 29 entries (29 files):
- elife_poa_e71744_Figure_1_figure_supplement_1.pdf
- elife_poa_e71744_Figure_1_figure_supplement_2.pdf
- elife_poa_e71744_Figure_1_figure_supplement_3.pdf
- elife_poa_e71744_Figure_1_figure_supplement_4.pdf
- elife_poa_e71744_Figure_2_figure_supplement_1.pdf
- elife_poa_e71744_Figure_2_figure_supplement_2.pdf
- elife_poa_e71744_Figure_2_figure_supplement_3.pdf
- elife_poa_e71744_Figure_3_figure_supplement_1.pdf
- elife_poa_e71744_Figure_4_figure_supplement_1.pdf
- elife_poa_e71744_Figure_7_figure_supplement_1.pdf
- elife_poa_e71744_Transparent_Reporting_File.docx
- elife_poa_e71744_Figure_1_source_data_1.xlsx
- elife_poa_e71744_Figure_1_source_data_2.xlsx
- elife_poa_e71744_Figure_1_figure_supplement_3_source_data_1.xlsx
- elife_poa_e71744_Figure_2_source_data_1.xlsx
- elife_poa_e71744_Figure_2_source_data_2.xlsx
- elife_poa_e71744_Figure_2_source_data_3.xlsx
- elife_poa_e71744_Figure_2_figure_supplement_3_source_data_1.xlsx
- elife_poa_e71744_Figure_3_source_data_1.xlsx
- elife_poa_e71744_Figure_3_source_data_2.xlsx
- elife_poa_e71744_Figure_3_source_data_3.xlsx
- elife_poa_e71744_Figure_3_source_data_4.xlsx
- elife_poa_e71744_Figure_3_figure_supplement_1_source_data_1.xlsx
- elife_poa_e71744_Figure_4_source_data_1.xlsx
- elife_poa_e71744_Figure_4_source_data_2.xlsx
- elife_poa_e71744_Figure_4_source_data_3.xlsx
- elife_poa_e71744_Figure_5_source_data_1.xlsx
- elife_poa_e71744_Figure_5_source_data_2.xlsx
- elife_poa_e71744_Figure_6_source_data_1.xlsx
