# Supplementary material for: Regulated delivery controls Drosophila Hedgehog, Wingless, and Decapentaplegic signaling
Source: eLife journal article supplement (doi:10.7554/elife.71744), 2021-07-22
Supplement: supp [file elife-71744-supp-v1.zip › elife_poa_e71744_Figure_1_figure_supplement_3_source_data_1.xlsx]

## Sheet: Sheet2
Figure 1 supplement3
	genotype	+		+,+		Hs,+,+		HL,+,+		Hs,HL,+,+
		sample #	width of Kn (µm)	sample #	width of Kn (µm)	sample #	width of Kn (µm)	sample #	width of Kn (µm)	sample #	width of Kn (µm)
		0003	22.794	0003	21.004	0000	21.549	0001	22.754	0008	21.389
		0002	22.581	0002	22.469	0001	21.688	0004	20.042	0009	20.453
		0004	22.581	0001	21.549	0002	22.373	0009	21.806	0003	24.052
		0005	22.021	0000	23.456	0003	22.451	0006	23.261	0004	22.408
		0006	21.276	0007	21.798	0004	21.232	0005	21.147	0005	21.881
		0007	20.234	0006	20.407	0005	21.608	0007	24.945	0006	23.729
		0000	21.688	0005	21.806	0006	21.147	0003	21.644	0001	21.195
		0001	20.641	0004	19.131	0007	22.208	0008	20.57	0006	20.716
								0000	22.435	0002	22.435
								0002	20.98	0000	21.865
	avg		21.727		21.4525		21.782		21.9584		22.0123
	stdev		0.887195		1.22395		0.47136		1.37166		1.12472
	ttest- all n.s.
