# Supplementary material for: Regulated delivery controls Drosophila Hedgehog, Wingless, and Decapentaplegic signaling
Source: eLife journal article supplement (doi:10.7554/elife.71744), 2021-07-22
Supplement: supp [file elife-71744-supp-v1.zip › elife_poa_e71744_Figure_1_source_data_1.xlsx]

## Sheet: qpcr-summary
Figure 1C
	number of Hh copies	1	1	2	2	3	3	3	4	overexpression
	genotype	+	Hs	+,+	Hs,+	Hs,+,+	HL,+,+	Hs,+,+	Hs,HL,+,+	G4>HhGFP,+,+
	fold difference against +	1	1.16927	1.89077	1.95568	3.2249	3.35077	2.78815	4.29098	38.0647

## Sheet: qpcr-HhBAC
genotype	+	+,+	Hs,+,+	HL,+,+	Hs,HL,+,+	G4>HhGFP,+,+
delta cq (Actin-Hh) for individual samples	6.6904	5.80433	5.23931	4.91963	4.66845	1.49937
		5.92252	5.06751	4.7432	4.27191	1.38067
		5.58743	4.69662	5.17489	4.82692
avg	6.6904	5.77143	5.00114	4.94591	4.58909	1.44002
normalized to +	1	1.89077	3.2249	3.35077	4.29098	38.0647

## Sheet: qpcr-HhGFPBAC
genotype	+	Hs	Hs,+	Hs,+,+
delta cq (Actin-Hh) for individual samples	4.56563	4.86553	3.42199	2.64474
		4.71695	3.65122	3.19421
			3.72067	3.42
avg	4.56563	4.79124	3.59796	3.08632
normalized to +	1	1.16927	1.95568	2.78815

## Sheet: ProteinAmount
All numerical values represent mean fluorescent intensity of anti-Hh staining in the posterior compartment of the wing disc
genotype	posterior	background	posterior-background				genotype	posterior	background	posterior-background
Hs,+,+_sample1	23.174	5.148	18.026				+_sample1	12.464	4.631	7.833
Hs,+,+_sample2	23.911	5.823	18.088				+_sample2	12.845	6.304	6.541
Hs,+,+_sample3	26.533	6.571	19.962				+_sample3	10.317	5.115	5.202
Hs,+,+_sample4	28.607	5.764	22.843				+_sample4	12.836	5.744	7.092
Hs,+,+_sample5	28.898	7.197	21.701				+_sample5	11.595	5.56	6.035
Hs,+,+_sample6	19.376	5.738	13.638				+_sample6	11.87	4.99	6.88
		avg	19.043						avg	6.59717
		stdev.p	2.98635						stdev	0.828434
		value normalized to +	2.88654						value normalized to +	1
