# Supplementary material for: Regulated delivery controls Drosophila Hedgehog, Wingless, and Decapentaplegic signaling
Source: eLife journal article supplement (doi:10.7554/elife.71744), 2021-07-22
Supplement: supp [file elife-71744-supp-v1.zip › elife_poa_e71744_Figure_1_source_data_2.xlsx]

## Sheet: Summary
Figure 1E	L3-L4 Intervein Length
	genoype in paper	+	Hs	+,+	Hs,+	Hs,+,+	HL,+,+	Hs,+,+	Hs,HL,+,+	Hh>Hh:GFP
	Drosophila genotype	hhac/+	hhGFP, hhac/hhac	+/+	hhgfp, hhac/+	40k BAC/plus	100k BAC/plus	hhgfp, +/+	40k BAC/100k BAC	Hh>UAS-Hh:GFP
	avg	13.8128	14.6878	13.4126	14.781	13.4598	13.0274	14.3654	13.4446	22.7579
	standard deviation	0.135118	0.911854	0.768042	1.50299	0.510266	0.777973	1.42147	1.69391	1.55474
	N	5	5	7	5	5	5	5	7	7
		Raw data length for each genotypes
		0,+	Hs, 0	0,+,+	Hs,+	0,Hs,+,+	0,HL,+,+	Hs,+,+	0,Hs,HL,+,+	Hh>Hh:GFP
		13.579	15.175	13.419	13.051	13.058	12.129	16.519	12.985	22.682
		13.945	13.184	12.95	17.011	14.154	14.13	14.014	12.182	22.854
		13.773	14.945	13.672	13.184	13.811	12.232	13.858	16.61	23.306
		13.822	15.875	14.142	15.032	13.543	13.01	12.261	15.04	22.854
		13.945	14.26	14.681	15.627	12.733	13.636	15.175	12.457	21.258
				12.718					11.271	25.821
				12.306					13.567	20.53
