# Supplementary material for: Regulated delivery controls Drosophila Hedgehog, Wingless, and Decapentaplegic signaling
Source: eLife journal article supplement (doi:10.7554/elife.71744), 2021-07-22
Supplement: supp [file elife-71744-supp-v1.zip › elife_poa_e71744_Figure_2_figure_supplement_3_source_data_1.xlsx]

## Sheet: sheet1
Figure 2 Supplement3
	genotype
	Hs (Hh:GFP),Hs (Hh 40kBAC),+,+
	sample #	disc1	disc2	disc3	disc4	disc5	disc6	disc7
	ventral compartment double positive count	29	27	26	26	31	31	27
	dorsal compartmentdouble positive count	28	26	33	24	26	26	33	avg	stdev
	average	28.5	26.5	29.5	25	28.5	28.5	30	28.0714	1.61308
	genotype
	Hs (Hh:GFP),HL (Hh 100kBAC),+,+
	sample #	disc1	disc2	disc3	disc4	disc5	disc6	disc7
	ventral compartment double positive count	28	27	23	30	26	31	29
	dorsal compartmentdouble positive count	30	33	26	24	28	24	33	avg	stdev
	average	29	30	24.5	27	27	27.5	31	28	2.01778
	genotype
	Hs(Hh:GFP),+
	sample #	disc1	disc2	disc3	disc4	disc5	disc6	disc7
	ventral compartment double positive count	31	23	31	31	27	23	25
	dorsal compartmentdouble positive count	31	26	30	28	30	25	23	avg	stdev
	average	31	24.5	30.5	29.5	28.5	24	24	27.4286	2.92072
