# Supplementary material for: Regulated delivery controls Drosophila Hedgehog, Wingless, and Decapentaplegic signaling
Source: eLife journal article supplement (doi:10.7554/elife.71744), 2021-07-22
Supplement: supp [file elife-71744-supp-v1.zip › elife_poa_e71744_Figure_2_source_data_1.xlsx]

## Sheet: posterior compartment intensity
	Genotypes:	+					Genotype:	+/+					Gentype:	Hs,+,+					Genotype:	HL,+,+				Genotype:	Hs,HL,+,+				Genotype:	hhG4>HhGFP
	sample#	measured region	mean intensity	posterior-background			sample#	measured region	mean intensity	posterior-background			sample#	measured region	mean intensity	posterior-background			sample#	measured region	mean intensity	posterior-background		sample#	measured region	mean intensity	posterior-background		sample#	measured region	mean intensity	posterior-background
	1	posterior compartment	241.724	60.884			1	posterior compartment	306.539	122.023			1	posterior	333.445	142.365			1	posterior	312.663	116.017		1	posterior	388.881	210.577		1	posterior	940.065	764.689
		background intensity	180.84					background intensity	184.516					background	191.08					background	196.646				background	178.304				background	175.376
	2	posterior compartment	228.299	48.785			2	posterior compartment	270.907	85.373			2	posterior	308.402	128.767			2	posterior	312.663	122.677		2	posterior	360.577	158.636		2	posterior	950.874	782.517
		background intensity	179.514					background intensity	185.534					background	179.635					background	189.986				background	201.941				background	168.357
	3	posterior compartment	235.357	54.201			3	posterior compartment	278.402	85.003			3	posterior	319.569	140.708			3	posterior	352.72	163.67		3	posterior	393.612	199.284		3	posterior	770.905	581.264
		background intensity	181.156					background intensity	193.399					background	178.861					background	189.05				background	194.328				background	189.641
	4	posterior compartment	230.61	49.016			4	posterior compartment	284.455	95.074			4	posterior	312.19	135.519			4	posterior	307.615	118.82		4	posterior	373.587	183.602		4	posterior	826.504	629.837
		background intensity	181.594					background intensity	189.381					background	176.671					background	188.795				background	189.985				background	196.667
	5	posterior compartment	236.101	42.507			5	posterior compartment	252.961	74.267			5	posterior	312.812	132.829			5	posterior	318.223	127.454		5	posterior	350.682	163.783		5	posterior	700.059	512.272
		background intensity	193.594					background intensity	178.694					background	179.983					background	190.769				background	186.899				background	187.787
	6	posterior compartment	216.118	39.049			6	posterior compartment	281.285	90.643																			6	posterior	717.083	495.256
		background intensity	177.069					background intensity	190.642																					background	221.827
							7	posterior compartment	287.789	107.309
								background intensity	180.48
			Average	49.0737					Average	94.2417					Average	136.038					Average	129.728				Average	183.176				Average	627.639
			Standard deviation	7.18187					Standard deviation	14.7319					Standard deviation	5.00548					Standard deviation	17.4007				Standard deviation	19.9437				Standard deviation	112.369

## Sheet: anterior compartment intensity
Figure 2B
	Genotypes:	+				Genotype:	+,+				Gentype:	Hs,+,+				Genotype:	HL,+,+				Genotype:	Hs,HL,+,+				Genotype:	HhG4>HhGFP
	sample#	measured region	mean intensity	posterior-background		sample#	measured region	mean intensity	posterior-background		sample#	measured region	mean intensity	posterior-background		sample#	measured region	mean intensity	posterior-background		sample#	measured region	mean intensity	posterior-background		sample#	measured region	mean intensity	posterior-background
	1	anterior compartment	194.205	13.365		1	anterior compartment	198.79	14.274		1	anterior compartment	202.256	11.176		1	anterior compartment	210.563	13.917		1	anterior compartment	188.809	10.505		1	anterior compartment	218.272	42.896
		background	180.84				background	184.516				background	191.08				background	196.646				background	178.304				background	175.376
	2	anterior compartment	192.117	12.603		2	anterior compartment	200.557	15.023		2	anterior compartment	194.131	14.496		2	anterior compartment	201.379	11.393		2	anterior compartment	201.941	14.931		2	anterior compartment	220.844	31.203
		background	179.514				background	185.534				background	179.635				background	189.986				background	187.01				background	189.641
	3	anterior compartment	194.354	13.198		3	anterior compartment	203.699	10.3		3	anterior compartment	193.769	14.908		3	anterior compartment	203.491	14.441		3	anterior compartment	208.863	14.535		3	anterior compartment	238.983	42.316
		background	195.458				background	193.399				background	178.861				background	189.05				background	194.328				background	196.667
	4	anterior compartment	181.594	14.198		4	anterior compartment	204.406	15.025		4	anterior compartment	189.277	12.606		4	anterior compartment	202.43	13.635		4	anterior compartment	206.272	16.287		4	anterior compartment	217.511	29.724
		background	181.156				background	189.381				background	176.671				background	188.795				background	189.985				background	187.787
	5	anterior compartment	193.594	11.562		5	anterior compartment	192.334	13.64		5	anterior compartment	191.055	11.072		5	anterior compartment	203.17	12.401		5	anterior compartment	201.055	14.156		5	anterior compartment	221.827	32.3
		background	182.032				background	178.694				background	179.983				background	190.769				background	186.899				background	189.527
	6	anterior compartment	177.069	10.375		6	anterior compartment	207.176	16.534
		background	187.444				background	190.642
						7	anterior compartment	194.721	14.241
							background	180.48
			avg	12.5502				avg	14.1481				avg	12.8516				avg	13.1574				avg	14.0828				avg	35.6878
			stdev	1.25894				stdev	1.92818				stdev	1.61045				stdev	1.10797				stdev	1.92813				stdev	5.71049
