# Supplementary material for: Regulated delivery controls Drosophila Hedgehog, Wingless, and Decapentaplegic signaling
Source: eLife journal article supplement (doi:10.7554/elife.71744), 2021-07-22
Supplement: supp [file elife-71744-supp-v1.zip › elife_poa_e71744_Figure_2_source_data_2.xlsx]

## Sheet: sheet1
Figure 2E
	Genotype: Hs,+,+						Genotype: Hs						Genotype: Hs,+
	sample#	measured compartment	averge intensity	background	intensity-background		sample#	measured compartment	averge intensity	background	intensity-background		sample#	measured compartment	averge intensity	background	intensity-background
	disc1	posterior	627.561	267.506	360.055		disc1	posterior	884.604	306.103	578.501		disc1	posterior	726.367	286.52	439.847
		anterior	293.309		25.803			anterior	445.686		139.583			anterior	332.595		46.075
	disc2	posterior	657.514	277.48	380.034		disc2	posterior	793.668	320.881	472.787		disc2	posterior	671.045	277.279	393.766
		anterior	312.242		34.762			anterior	443.773		122.892			anterior	329.835		52.556
	disc3	posterior	744.489	280.801	463.688		disc3	posterior	676.757	339.508	337.249		disc3	posterior	607.154	283.499	323.655
		anterior	299.225		18.424			anterior	409.154		69.646			anterior	326.263		42.764
	disc4	posterior	652.112	272.486	379.626		disc4	posterior	875.054	287.924	587.13		disc4	posterior	636.478	285.168	351.31
		anterior	304.293		31.807			anterior	395.424		107.5			anterior	323.85		38.682
									715.281	332.978	382.303
									409.31		76.332
									636.851	265.9	370.951
									346.469		80.569
				anterior compartment average	27.699					anterior compartment average	99.4203					anterior compartment average	45.0192
				anterior compartment stdev	6.25264					anterior compartment stdev	25.8334					anterior compartment stdev	5.07849
				posterior comparment average	395.851					posterior comparment average	454.82					posterior comparment average	377.144
				posterior comparment stdev	39.9895					posterior comparment stdev	99.3658					posterior comparment stdev	43.9785
