# Supplementary material for: Regulated delivery controls Drosophila Hedgehog, Wingless, and Decapentaplegic signaling
Source: eLife journal article supplement (doi:10.7554/elife.71744), 2021-07-22
Supplement: supp [file elife-71744-supp-v1.zip › elife_poa_e71744_Figure_2_source_data_3.xlsx]

## Sheet: +
	disc1				disc2					disc3					disc4					disc5					disc6
	measured region	intensity	intensity-background		measured region	intensity	intensity-background			measured region	intensity	intensity-background			measured region	intensity	intensity-background			measured region	intensity	intensity-background			measured region	intensity	intensity-background
	posterior	268.719	100.566		posterior	312.084	144.719			posterior	331.756	150.486			posterior	284.675	108.624			posterior	318.111	145.476			posterior	342.864	157.272
	anterior	182.537	14.384		anterior	187.309	19.944			anterior	202.861	21.591			anterior	190.157	14.106			anterior	192.021	19.386			anterior	202.552	16.96
	background	168.153			background	167.365				background	181.27				background	176.051				background	172.635				background	185.592

## Sheet: Hs,+,+
	disc1					disc2					disc3				disc4					disc5
	measured region	intensity	intensity-background			measured region	intensity	intensity-background			measured region	intensity	intensity-background		measured region	intensity	intensity-background			measured region	intensity	intensity-background
	posterior	240.16	71.806			posterior	263.532	88.85			posterior	257.462	80.418		posterior	281.323	95.155			posterior	206.136	43.38
	anterior	176.899	8.545			anterior	182.342	7.66			anterior	185.521	8.477		anterior	191.894	5.726			anterior	167.353	4.597
	background	168.354				background	174.682				background	177.044			background	186.168				background	162.756

## Sheet: HL,+,+
	disc1				disc2				disc3				disc4				disc5				disc6
	measured region	intensity	intensity-background		measured region	intensity	intensity-background		measured region	intensity	intensity-background		measured region	intensity	intensity-background		measured region	intensity	intensity-background		measured region	intensity	intensity-background
	posterior	268.809	98.393		posterior	270.145	99.618		posterior	260.76	83.479		posterior	260.76	83.479		posterior	237.638	64.098		posterior	212.377	25.584
	anterior	182.648	12.232		anterior	179.741	9.214		anterior	184.25	6.969		anterior	184.25	6.969		anterior	179.475	5.935		anterior	193.038	6.245
	background	170.416			background	170.527			background	177.281			background	177.281			background	173.54			background	186.793

## Sheet: summary
Figure 2F
	producing cell										receiving cell
	genotype	disc1	disc2	disc3	disc4	disc5	disc6	avg	stdev		genotype	disc1	disc2	disc3	disc4	disc5	disc6	avg	stdev
	+	100.566	144.719	150.486	108.624	145.476	157.272	134.524	21.6799		+	14.384	19.944	21.591	14.106	19.386	16.96	17.7285	2.81287
	Hs,+,+	71.806	88.85	80.418	95.155	43.38		75.9218	18.0731		Hs,+,+	8.545	7.66	8.477	5.726	4.597		7.001	1.57491
	HL,+,+	98.393	99.618	83.479	83.479	64.098	25.584	75.7752	25.3451		HL,+,+	12.232	9.214	6.969	6.969	5.935	6.245	7.92733	2.19173
