# Supplementary material for: Regulated delivery controls Drosophila Hedgehog, Wingless, and Decapentaplegic signaling
Source: eLife journal article supplement (doi:10.7554/elife.71744), 2021-07-22
Supplement: supp [file elife-71744-supp-v1.zip › elife_poa_e71744_Figure_3_figure_supplement_1_source_data_1.xlsx]

## Sheet: Sheet1
Figure 3 supplement
	genotype	WT		genotype	DB/DB;+/+
	sample #	length of Salm band (µm)		sample #	length of Salm band (µm)
	disc1	84.127		disc1	83.92
	disc2	104.889		disc2	94.988
	disc3	97.347		disc3	74.896
	disc4	82.915		disc4	87.977
	disc5	84.72		disc5	74.046
	disc6	91.83		disc6	89.388
	disc7	90		disc7	90.955
	disc8	83.509		disc8	101.572
	avg	89.9171		avg	87.2178
	stdev	7.36254		stdev	8.81668
	ttest	0.544093
