# Supplementary material for: Regulated delivery controls Drosophila Hedgehog, Wingless, and Decapentaplegic signaling
Source: eLife journal article supplement (doi:10.7554/elife.71744), 2021-07-22
Supplement: supp [file elife-71744-supp-v1.zip › elife_poa_e71744_Figure_3_source_data_1.xlsx]

## Sheet: Sheet1
Figure 3B
	genotype	WT			genotype	BD/BD;+/+			genotype	BD; dppH46/+			genotype	Dpp:Cherry/Dpp:Cherry
		sample#	size (µm^2)			sample#	size (µm^2)			sample#	size (µm^2)			sample#	size (µm^2)
		wing1	1.60639e+06			wing1	1.8425e+06			wing1	1.95053e+06			wing1	1.60895e+06
		wing2	1.93151e+06			wing2	1.99542e+06			wing2	1.96388e+06			wing2	1.66972e+06
		wing3	1.83454e+06			wing3	1.83357e+06			wing3	1.50644e+06			wing3	1.79059e+06
		wing4	1.75711e+06			wing4	1.7318e+06			wing4	1.88136e+06			wing4	1.84475e+06
		wing5	1.71067e+06			wing5	1.81182e+06			wing5	1.49152e+06			wing5	1.57724e+06
		wing6	1.66094e+06			wing6	1.77095e+06			wing6	1.94687e+06			wing6	1.84103e+06
		wing7	1.62656e+06			wing7	1.84405e+06			wing7	1.99382e+06			wing7	1.65882e+06
		wing8	1.85325e+06			wing8	1.75268e+06			wing8	1.63514e+06			wing8	1.54043e+06
		wing9	1.63591e+06							wing9	1.61977e+06			wing9	1.56477e+06
										wing10	1.65184e+06			wing10	1.68239e+06
										wing11	1.7361e+06			wing11	1.65068e+06
										wing12	1.73403e+06			wing12	1.69288e+06
										wing13	1.83722e+06
										wing14	1.91107e+06
		count	9			count	8			count	14			count	12
		avg	1.73521e+06			avg	1.82285e+06			avg	1.75928e+06			avg	1.67685e+06
		stdev	109133			stdev	76454			stdev	174823			stdev	97952.1
