# Supplementary material for: Regulated delivery controls Drosophila Hedgehog, Wingless, and Decapentaplegic signaling
Source: eLife journal article supplement (doi:10.7554/elife.71744), 2021-07-22
Supplement: supp [file elife-71744-supp-v1.zip › elife_poa_e71744_Figure_3_source_data_2.xlsx]

## Sheet: Sheet1
Figure 3D
	genotype:WT					genotype:DB/DB;+/+
	sample#	measured region	fluorescent intensity	dpp stripe-background intensity		sample#	measured region	fluorescent intensity	dpp stripe-background intensity
	disc1	dpp stripe signal	298.352	75.467		disc1	dpp stripe signal	483.594	170.94
		background	222.885				background	312.654
	disc2	dpp stripe signal	335.099	94.481		disc2	dpp stripe signal	606.245	255.572
		background	240.618				background	350.673
	disc3	dpp stripe signal	381.348	124.39		disc3	dpp stripe signal	427.126	157.167
		background	256.958				background	269.959
	disc4	dpp stripe signal	344.805	107.175		disc4	dpp stripe signal	483.52	184.636
		background	237.63				background	298.884
	disc5	dpp stripe signal	366.532	120.368		disc5	dpp stripe signal	548.512	229.514
		background	246.164				background	318.998
	disc6	dpp stripe signal	296.771	79.084		disc6	dpp stripe signal	472.957	164.458
		background	217.687				background	308.499
	disc7	dpp stripe signal	311.092	88.287		disc7	dpp stripe signal	443.558	164.032
		background	222.805				background	279.526
						disc8	dpp stripe signal	549.177	230.926
							background	318.251
		avg		98.4646				avg	194.656
		stdev		17.9352				stdev	35.636
		count		7				count	8
		ttest		4.33737e-05
