# Supplementary material for: Regulated delivery controls Drosophila Hedgehog, Wingless, and Decapentaplegic signaling
Source: eLife journal article supplement (doi:10.7554/elife.71744), 2021-07-22
Supplement: supp [file elife-71744-supp-v1.zip › elife_poa_e71744_Figure_3_source_data_3.xlsx]

## Sheet: Sheet1
Figure 3F
	genotype:WT				genotype:DB/DB;+/+
		sample#	pmad length (µm)			sample#	pmad length (µm)
		disc1	59.44			disc1	55.76
		disc2	52.66			disc2	57.83
		disc3	52.83			disc3	59.67
		disc4	64.12
		disc5	62.1
		disc6	61.55
		disc7	56.13
		avg	58.4043			avg	57.7533
		stdev	4.25168			stdev	1.59717
