# Supplementary material for: Regulated delivery controls Drosophila Hedgehog, Wingless, and Decapentaplegic signaling
Source: eLife journal article supplement (doi:10.7554/elife.71744), 2021-07-22
Supplement: supp [file elife-71744-supp-v1.zip › elife_poa_e71744_Figure_3_source_data_4.xlsx]

## Sheet: Sending cells
	genotype: WT					genotype:DB/DB;+/+
sample#	intensity in sending region	backround intensity	sending-background intensity		sample#	intensity in sending region	backround intensity	sending-background intensity
disc1	257.901	165.582	92.319		disc1	307.184	176.318	130.866
disc2	254.172	165.282	88.89		disc2	282.975	171.059	111.916
disc3	268.892	165.185	103.707		disc3	314.567	171.178	143.389
disc4	296.782	166.393	130.389		disc4	289.276	173.082	116.194
disc5	306.762	166.445	140.317		disc5	302.33	169.972	132.358
disc6	284.728	168.105	116.623
		avg	112.041				avg	126.945
		stdev	18.9366				stdev	11.4589
		count	6				count	5

## Sheet: Receiving cells
Figure 3I
		genotype: WT					genotype: DB/DB;+/+
	sample#	intensity in sending region	backround intensity	sending-background intensity		sample#	intensity in sending region	backround intensity	sending-background intensity
	disc1	178.295	165.582	12.713		disc1	183.323	176.318	7.005
	disc2	177.317	165.282	12.035		disc2	176.057	171.059	4.998
	disc3	178.974	165.185	13.789		disc3	182.678	171.178	11.5
	disc4	178.377	166.393	11.984		disc4	178.06	173.082	4.978
	disc5	185.06	166.445	18.615		disc5	179.308	169.972	9.336
	disc6	185.796	168.105	17.691
			avg	14.4712				avg	7.703
			stdev	2.68378				stdev	2.82075
			count	6				count	4
