# Supplementary material for: Regulated delivery controls Drosophila Hedgehog, Wingless, and Decapentaplegic signaling
Source: eLife journal article supplement (doi:10.7554/elife.71744), 2021-07-22
Supplement: supp [file elife-71744-supp-v1.zip › elife_poa_e71744_Figure_4_source_data_1.xlsx]

## Sheet: intensity in the receiving cell
					Figure 4B
	Genotype:wgRF/wg+					Genotype: wg+/wg+					wgGal4>Wg:GFP
	disc1	intensity	intensity-background intensity	average of receive1,2		disc1	intensity	intensity-background intensity	average of receive1,2		disc1	intensity	intensity-background intensity	average of receive1,2			wgRF/wg+	wg+/wg+	wgGal4>wg:GFP
	receiving cell region#1	5819.63	361.204	385.089		receiving cell region#1	5737.72	380.887	388.286		receiving cell region#1	6441.06	368.146	297.926		avg	388.355	448.713	330.399
	receiving cell region#2	5867.4	408.974			receiving cell region#2	5752.52	395.685			receiving cell region#2	6300.62	227.706			stdev	28.3177	79.925	105.733
	background	5458.43				background	5356.83				background	6072.91
	disc2	intensity	intensity-background intensity	average of receive1,2		disc2	intensity	intensity-background intensity	average of receive1,2		disc2	intensity	intensity-background intensity	average of receive1,2
	receiving cell region#1	5831.66	362.942	339.05		receiving cell region#1	5941.71	524.209	578.311		receiving cell region#1	6755.96	555.763	467.605
	receiving cell region#2	5783.88	315.158			receiving cell region#2	6049.91	632.414			receiving cell region#2	6579.64	379.447
	background	5468.72				background	5417.5				background	6200.19
	disc3	intensity	intensity-background intensity	average of receive1,2		disc3	intensity	intensity-background intensity	average of receive1,2		disc3	intensity	intensity-background intensity	average of receive1,2
	receiving cell region#1	5752.82	380.124	393.424		receiving cell region#1	5703.37	408.42	381.078		receiving cell region#1	6537.11	620.09	416.885
	receiving cell region#2	5779.43	406.724			receiving cell region#2	5648.68	353.736			receiving cell region#2	6130.7	213.679
	background	5372.7				background	5294.95				background	5917.02
	disc4	intensity	intensity-background intensity	average of receive1,2		disc4	intensity	intensity-background intensity	average of receive1,2		disc4	intensity	intensity-background intensity	average of receive1,2
	receiving cell region#1	5698.35	409.067	397.717		receiving cell region#1	5664.14	350.26	354.111		receiving cell region#1	6151.35	164.971	163.181
	receiving cell region#2	5675.65	386.368			receiving cell region#2	5671.84	357.963			receiving cell region#2	6147.77	161.391
	background	5289.28				background	5313.88				background	5986.38
	disc5	intensity	intensity-background intensity	average of receive1,2		disc5	intensity	intensity-background intensity	average of receive1,2		disc5	intensity	intensity-background intensity	average of receive1,2
	receiving cell region#1	5744.91	405.195	426.492		receiving cell region#1	5898.67	465.038	498.893		receiving cell region#1	6299.75	190.739	306.4
	receiving cell region#2	5787.5	447.79			receiving cell region#2	5966.38	532.748			receiving cell region#2	6531.07	422.061
	background	5339.71				background	5433.64				background	6109.01
						disc6	intensity	intensity-background intensity	average of receive1,2
						receiving cell region#1	5846.14	430.248	491.595
						receiving cell region#2	5968.84	552.943
						background	5415.89

## Sheet: intensity in the sending cells
Figure 4B
	Genotype:wgRF/wg+				Genotype: wg+/wg+				wgGal4>Wg:GFP
	sample#1	intensity	intensity-background intensity		sample#1	intensity	intensity-background intensity		sample#1	intensity	intensity-background intensity			wgRF/wg+	wg+/wg+	wgGal4>wg:GFP
	sending cell	8949.13	3490.7		sending cell	11730.1	6373.29		sending cell	27030.3	20957.4		avg	3576.26	7423.23	27900.3
	background	5458.43			background	5356.83			background	6072.91			stdev	217.974	1293.62	4175.8
	sample#2	intensity	intensity-background intensity		sample#2	intensity	intensity-background intensity		sample#2	intensity	intensity-background intensity
	sending cell	8981.41	3512.69		sending cell	13755.5	8337.99		sending cell	36258.7	30058.5
	background	5468.72			background	5417.5			background	6200.19
	sample#3	intensity	intensity-background intensity		sample#3	intensity	intensity-background intensity		sample#3	intensity	intensity-background intensity
	sending cell	8959.84	3587.14		sending cell	10745.1	5450.14		sending cell	35055.8	29138.7
	background	5372.7			background	5294.95			background	5917.02
	sample#4	intensity	intensity-background intensity		sample#4	intensity	intensity-background intensity		sample#4	intensity	intensity-background intensity
	sending cell	8605.65	3316.36		sending cell	12109.5	6795.61		sending cell	32019.6	26033.2
	background	5289.28			background	5313.88			background	5986.38
	sample#5	intensity	intensity-background intensity		sample#5	intensity	intensity-background intensity		sample#5	intensity	intensity-background intensity
	sending cell	9314.14	3974.43		sending cell	14414.6	8980.96		sending cell	39422.7	33313.7
	background	5339.71			background	5433.64			background	6109.01
					sample#6	intensity	intensity-background intensity
					sending cell	14017.3	8601.36
					background	5415.89

## Sheet: percent release
Figure 4B
	wg+/wg+
	disc1		area	mean intensity	mean intensity minus background	total intensity	% release
		sending cells	2280.35	9480.95	4034.96	9.20113e+06	0.245464			wg+/wg+	wgrf/wg+	wgG4>wg:GFP
		whole pouch	21344.3	6017.3	571.32	1.21944e+07			disc1	0.245464	0.419889	0.053806
		background	966.078	5445.98					disc2	0.246244	0.4258	0.0441027
		receiving cell				2.9933e+06			disc3	0.279909	0.442847	0.0255003
									disc4	0.239949	0.389644	0.0441788
									disc5	0.203569	0.510465	0.0244203
	disc2		area	mean intensity	mean intensity minus background	total intensity	% release		disc6	0.230949		0.020948
		sending cells	2560.76	10906.7	5305.21	1.35854e+07	0.246244		avg	0.241014	0.437729	0.0354927
		whole pouch	24303.1	6343.08	741.617	1.80236e+07			stdev	0.0225999	0.0402231	0.0123757
		background	1321.8	5601.47
		receiving cell				4.4382e+06				6.95476e-06	5.9113e-09
	disc3		area	mean intensity	mean intensity minus background	total intensity	% release
		sending cells	2575.82	11798.7	6357.39	1.63755e+07	0.279909
		whole pouch	21274.2	6510.28	1068.94	2.27409e+07
		background	854.552	5441.34
		receiving cell				6.36537e+06
	disc4		area	mean intensity	mean intensity minus background	total intensity	% release
		sending cells	2901.13	11494.6	5965.6	1.7307e+07	0.239949
		whole pouch	24014.4	6477.19	948.217	2.27708e+07
		background	1232.97	5528.97
		receiving cell				5.46384e+06
	disc5		area	mean intensity	mean intensity minus background	total intensity	% release
		sending cells	3401.79	9555.14	4216.91	1.43451e+07	0.203569
		whole pouch	25187	6053.35	715.118	1.80117e+07
		background	1344.49	5338.23
		receiving cell				3.66661e+06
	disc6		area	mean intensity	mean intensity minus background	total intensity	% release
		sending cells	2592.82	10311.4	4849.28	1.25733e+07	0.230949
		whole pouch	30544.4	5997.33	535.257	1.63491e+07
		background	2002.26	5462.07
		receiving cell				3.77581e+06
	wgrf/wg+
	disc1		area	mean intensity	mean intensity minus background	total intensity	% release
		sending cells	2767.59	8475.39	3008.5	8.32629e+06	0.419889
		whole pouch	24186.7	6060.32	593.421	1.43529e+07
		background	764.848	5466.9
		receiving cell				6.02662e+06
	disc2		area	mean intensity	mean intensity minus background	total intensity	% release
		sending cells	2659.93	8314.43	2903.41	7.72285e+06	0.4258
		whole pouch	26232.1	5923.74	512.721	1.34498e+07
		background	572.502	5411.02
		receiving cell				5.72692e+06
	disc3		area	mean intensity	mean intensity minus background	total intensity	% release
		sending cells	2913.59	8381.14	3058.88	8.91232e+06	0.442847
		whole pouch	26956.5	5915.66	593.407	1.59962e+07
		background	324.826	5322.25
		receiving cell				7.08387e+06
	disc4		area	mean intensity	mean intensity minus background	total intensity	% release
		sending cells	3539.2	7984.5	2630.48	9.30977e+06	0.389644
		whole pouch	24249.8	5983.02	628.996	1.5253e+07
		background	557.728	5354.02
		receiving cell				5.94324e+06
	disc5		area	mean intensity	mean intensity minus background	total intensity	% release
		sending cells	1599.41	8434.38	3031.21	4.84816e+06	0.510465
		whole pouch	22916.2	5835.34	432.166	9.9036e+06
		background	1064.57	5403.17
		receiving cell				5.05544e+06
	wgG4>wg:GFP
	disc1		area	mean intensity	mean intensity minus background	total intensity	% release
		sending cells	1587.54	10954.7	5957.17	9.45723e+06	0.053806
		whole pouch	20252.3	5491.02	493.525	9.99502e+06
		background	927.358	4997.49
		receiving cell				537792
	disc2		area	mean intensity	mean intensity minus background	total intensity	% release
		sending cells	1366.22	41036.7	34014.5	4.64714e+07	0.0441027
		whole pouch	18287.8	9680.5	2658.35	4.86154e+07
		background	985.004	7022.14
		receiving cell				2.14407e+06
	disc3		area	mean intensity	mean intensity minus background	total intensity	% release
		sending cells	1630.6	41247.8	34348	5.60078e+07	0.0255003
		whole pouch	20373.7	9720.84	2820.96	5.74734e+07
		background	1299.4	6899.88
		receiving cell				1.46559e+06
	disc4		area	mean intensity	mean intensity minus background	total intensity	% release
		sending cells	1138.05	43963.9	36365.2	4.13854e+07	0.0441788
		whole pouch	13385	10833.6	3234.84	4.32983e+07
		background	835.144	7598.77
		receiving cell				1.91287e+06
	disc5		area	mean intensity	mean intensity minus background	total intensity	% release
		sending cells	1981.02	33261.6	26841	5.31724e+07	0.0244203
		whole pouch	21326	8976.3	2555.72	5.45034e+07
		background	1508.74	6420.58
		receiving cell				1.33099e+06
	disc6		area	mean intensity	mean intensity minus background	total intensity	% release
		sending cells	1811.46	30181.2	23777.6	4.3072e+07	0.020948
		whole pouch	20931.8	8505.38	2101.76	4.39936e+07
		background	1004.8	6403.61
		receiving cell				921579
