# Supplementary material for: Regulated delivery controls Drosophila Hedgehog, Wingless, and Decapentaplegic signaling
Source: eLife journal article supplement (doi:10.7554/elife.71744), 2021-07-22
Supplement: supp [file elife-71744-supp-v1.zip › elife_poa_e71744_Figure_4_source_data_2.xlsx]

## Sheet: Sheet1
Figure 4C
		WT	wgG4>wg:GFP
	disc1	15.8424	16.7712
	disc2	16.267	19.2106
	disc3	18.9936	19.4936
	disc4	19.5472	18.3228
	avg	17.6626	18.4496
	stdev	1.62666	1.06091
