# Supplementary material for: Regulated delivery controls Drosophila Hedgehog, Wingless, and Decapentaplegic signaling
Source: eLife journal article supplement (doi:10.7554/elife.71744), 2021-07-22
Supplement: supp [file elife-71744-supp-v1.zip › elife_poa_e71744_Figure_4_source_data_3.xlsx]

## Sheet: OE
exwg- wgoe-0001		area1	area	intensity		area2	area	intensity		area3	area	intensity		total avg			area	intensity
		sending	205.736	285.412		sending	221.744	289.906		sending	189.986	231.665				background	100.851	185.898
		entire	2762.89	207.351		entire	2775.34	207.088		entire	2694.4	205.533
				intensity
after background subtraction			sending	99.514			sending	104.008			sending	45.767		83.0963
			entire	21.453			entire	21.19			entire	19.635		20.7593
		receiving intensity		15.1726				13.9984				17.6526		15.6079
exwg- wgoe-0002		area1	area	intensity		area2	area	intensity		area3	area	intensity		total avg			area	intensity
		sending	148.015	268.87		sending	169.43	273.141		sending	211.873	266.678				background	68.665	196.566
		entire	2302.41	212.046		entire	2314.85	214.892		entire	2265.07	216.701
				intensity
after background subtraction			sending	73.87			sending	78.141			sending	71.678		74.563
			entire	17.046			entire	19.892			entire	21.701		19.5463
		receiving intensity		13.142				15.2919				16.5438		14.9926
exwg- wgoe-0003		area1	area	intensity		area2	area	intensity		area3	area	intensity		total avg			area	intensity
		sending	174.279	244.478		sending	194.879	259.115		sending	169.473	297.826				background	67.291	189.544
		entire	2501.53	205.755		entire	2339.74	211.561		entire	2364.64	210.982
				intensity
after background subtraction			sending	54.934			sending	69.571			sending	108.282		77.5957
			entire	16.211			entire	22.017			entire	21.438		19.8887
		receiving intensity		13.3112				17.6963				14.7334		15.247
exwg- wgoe-0004		area1	area	intensity		area2	area	intensity		area3	area	intensity		total avg			area	intensity
		sending	160.46	232.943		sending	160.203	231.188		sending	214.233	227.475				background	32.444	186.255
		entire	2675.77	193.726		entire	2613.54	195.198		entire	2601.1	194.891
				intensity
after background subtraction			sending	50.45			sending	48.695			sending	44.982		48.0423
			entire	11.233			entire	12.705			entire	12.398		12.112
		receiving intensity		8.73122				10.3549				9.47343		9.51983
exwg- wgoe-0006		area1	area	intensity		area2	area	intensity		area3	area	intensity		total avg			area	intensity
		sending	162.005	273.068		sending	150.29	273.627		sending	153.294	260.586				background	91.324	194.357
		entire	2252.63	210.825		entire	2190.4	213.892		entire	2289.96	211.113
				intensity
after background subtraction			sending	78.711			sending	79.27			sending	66.229		74.7367
			entire	16.468			entire	19.535			entire	16.756		17.5863
		receiving intensity		11.6447				15.1345				13.2066		13.3286
exwg- wgoe-0007		area1	area	intensity		area2	area	intensity		area3	area	intensity		total avg			area	intensity
		sending	194.235	245.493		sending	167.241	240.537		sending	155.826	243.814				background	48.537	181.187
		entire	2663.33	198.138		entire	2601.1	198.248		entire	2762.89	196.678
				intensity
after background subtraction			sending	64.306			sending	59.35			sending	62.627		62.0943
			entire	16.951			entire	17.061			entire	15.491		16.501
		receiving intensity		13.2257				14.1551				12.6736		13.3515
exwg- wgoe-0008		area1	area	intensity		area2	area	intensity		area3	area	intensity		total avg			area	intensity
		sending	253.029	228.203		sending	218.267	226.818		sending	195.909	239.272				background	51.498	182.426
		entire	2426.86	199.376		entire	2426.86	198.334		entire	2352.19	201.553
				intensity
after background subtraction			sending	45.777			sending	44.392			sending	56.846		49.005
			entire	16.95			entire	15.908			entire	19.127		17.3283
		receiving intensity		13.5946				13.093				15.7		14.1292
exwg- wgoe-0010		area1	area	intensity		area2	area	intensity		area3	area	intensity		total avg			area	intensity
		sending	108.662	273.227		sending	175.781	254.495		sending	159.473	230.747				background	53.644	193.092
		entire	2215.29	209.014		entire	2128.17	210.456		entire	2103.28	211.408
				intensity
after background subtraction			sending	80.135			sending	61.403			sending	37.655		59.731
			entire	15.922			entire	17.364			entire	18.316		17.2007
		receiving intensity		12.6098				13.399				16.7294		14.2461

## Sheet: RF
RF_0001		area1	area	intensity		area2	area	intensity		area3	area	intensity		total avg			area	intensity
		sending	234.35	196.888		sending	178.152	198.611		sending	266.987	203.978				background	47.7	179.512
		entire	2217.68	189.744		entire	2335.97	188.492		entire	2266.64	190.053
				intensity
after background subtraction			sending	17.376			sending	19.099			sending	24.466		20.3137
			entire	10.232			entire	8.98			entire	10.541		9.91767
		receiving intensity		9.38787				8.14456				8.68178		8.73807
RF_0002		area1	area	intensity		area2	area	intensity		area3	area	intensity		total avg			area	intensity
		sending	219.48	197.298		sending	166.855	191.343		sending	133.542	191.532				background	60.833	184.711
		entire	2154.24	191.47		entire	2191.71	188.796		entire	2154.24	188.168
				intensity
after background subtraction			sending	12.588			sending	6.633			sending	6.822		8.681
			entire	6.76			entire	4.086			entire	3.458		4.768
		receiving intensity		6.09887				3.87612				3.23568		4.40356
RF_0003		area1	area	intensity		area2	area	intensity		area3	area	intensity		total avg			area	intensity
		sending	247.235	182.324		sending	237.708	185.186		sending	294.013	180.273				background	82.397	172.584
		entire	2650.88	176.449		entire	2638.43	176.356		entire	2638.43	175.806
				intensity
after background subtraction			sending	9.77551			sending	12.6375			sending	7.72451		10.0458
			entire	3.90051			entire	3.80751			entire	3.25751		3.65518
		receiving intensity		3.29622				2.93321				2.6973		2.97558
RF_0004		area1	area	intensity		area2	area	intensity		area3	area	intensity		total avg			area	intensity
		sending	252.256	200.676		sending	224.662	200.069		sending	296.717	200.04				background	82.612	182.345
		entire	2874.9	189.881		entire	2825.12	190.451		entire	2825.12	190.403
				intensity
after background subtraction			sending	18.331			sending	17.724			sending	17.695		17.9167
			entire	7.536			entire	8.106			entire	8.058		7.9
		receiving intensity		6.49769				7.27507				6.92706		6.89994
RF_0005		area1	area	intensity		area2	area	intensity		area3	area	intensity		total avg			area	intensity
		sending	400.786	191.066		sending	302.939	195.135		sending	384.049	191.87				background	109.52	179.093
		entire	2625.99	185.67		entire	2688.22	186.162		entire	2738	185.975
				intensity
after background subtraction			sending	11.973			sending	16.042			sending	12.777		13.5973
			entire	6.577			entire	7.069			entire	6.882		6.84267
		receiving intensity		5.60512				5.9294				5.92023		5.81825
RF_0006		area1	area	intensity		area2	area	intensity		area3	area	intensity		total avg			area	intensity
		sending	312.51	183.871		sending	231.4	185.247		sending	284.142	186.94				background	79.651	176.872
		entire	2538.87	180.957		entire	2551.32	182.216		entire	2588.65	180.881
				intensity
after background subtraction			sending	6.999			sending	8.375			sending	10.068		8.48067
			entire	4.085			entire	5.344			entire	4.009		4.47933
		receiving intensity		3.67597				5.04167				3.26194		3.99319
RF_0006		area1	area	intensity		area2	area	intensity		area3	area	intensity		total avg			area	intensity
		sending	277.276	188.675		sending	295.086	183.162		sending	253.329	183.521				background	70.038	175.273
		entire	2538.87	181.814		entire	2439.31	181.169		entire	2464.2	182.509
				intensity
after background subtraction			sending	13.402			sending	7.889			sending	8.248		9.84633
			entire	6.541			entire	5.896			entire	7.236		6.55767
		receiving intensity		5.69983				5.62173				7.12004		6.1472

## Sheet: wt
wt		area1	area	intensity		area2	area	intensity		area3	area	intensity		total avg			area	intensity
		sending	188.999	232.127		sending	189.943	212.232		sending	192.647	205.782				background	85.831	179.581
		entire	2339.74	195.387		entire	2339.74	195.266		entire	2277.52	195.089
				intensity
after background subtraction			sending	52.546			sending	32.651			sending	26.201		37.1327
			entire	15.806			entire	15.685			entire	15.508		15.6663
		receiving intensity		12.5774				14.186				14.5199		13.7611
wt_0002		area1	area	intensity		area2	area	intensity		area3	area	intensity		total avg			area	intensity
		sending	226.55	244.868		sending	310.149	236.466		sending	226.765	241.293				background	44.417	196.327
		entire	2090.84	213.756		entire	2140.62	213.222		entire	2103.28	212.947
				intensity
after background subtraction			sending	48.541			sending	40.139			sending	44.966		44.5487
			entire	17.429			entire	16.895			entire	16.62		16.9813
		receiving intensity		13.6482				12.9566				13.1946		13.2665
wt_0003		area1	area	intensity		area2	area	intensity		area3	area	intensity		total avg			area	intensity
		sending	252.299	214.755		sending	233.116	217.543		sending	207.496	219.266				background	68.579	184.218
		entire	2352.19	198.784		entire	2339.74	197.74		entire	2241.64	199.196
				intensity
after background subtraction			sending	30.537			sending	33.325			sending	35.048		32.97
			entire	14.566			entire	13.522			entire	14.978		14.3553
		receiving intensity		12.6471				11.3306				12.9307		12.3028
wt_0004		area1	area	intensity		area2	area	intensity		area3	area	intensity		total avg			area	intensity
		sending	264.144	220.782		sending	239.511	221.05		sending	189.342	231.693				background	115.657	186.549
		entire	2464.2	200.037		entire	2389.53	202.891		entire	2364.64	201.815
				intensity
after background subtraction			sending	34.233			sending	34.501			sending	45.144		37.9593
			entire	13.488			entire	16.342			entire	15.266		15.032
		receiving intensity		10.9973				14.3191				12.6654		12.6606
wt_0007		area1	area	intensity		area2	area	intensity		area3	area	intensity		total avg			area	intensity
		sending	216.197	219.894		sending	259.649	210.597		sending	298.272	208.622				background	113.747	190.357
		entire	2416.5	196.645		entire	2397.77	196.56		entire	2435.23	196.712
				intensity
after background subtraction			sending	29.537			sending	20.24			sending	18.265		22.6807
			entire	6.288			entire	6.203			entire	6.355		6.282
		receiving intensity		4.0036				4.49837				4.69263		4.3982
wt_0008		area1	area	intensity		area2	area	intensity		area3	area	intensity		total avg			area	intensity
		sending	247.836	210.173		sending	241.957	205.953		sending	283.885	221.457				background	75.316	185.917
		entire	2327.3	196.989		entire	2414.42	195.055		entire	2489.09	196.647
				intensity
after background subtraction			sending	24.256			sending	20.036			sending	35.54		26.6107
			entire	11.072			entire	9.138			entire	10.73		10.3133
		receiving intensity		9.5007				7.92424				7.53611		8.32035
wt_0009		area1	area	intensity		area2	area	intensity		area3	area	intensity		total avg			area	intensity
		sending	257.32	212.917		sending	223.975	232.168		sending	360.918	212.054				background	76.218	186.845
		entire	2426.86	196.677		entire	2302.41	198.52		entire	2401.97	196.186
				intensity
after background subtraction			sending	26.072			sending	45.323			sending	25.209		32.2013
			entire	9.832			entire	11.675			entire	9.341		10.2827
		receiving intensity		7.90584				8.04904				6.53507		7.49665

## Sheet: summary
Figure 4D
	Mean intensity values for sending and receiving cells are shown for each genotype
	p values for t test are below 0.05 for comparison between sending and receiving for each genotype
		genotype:wgRF/+
		sample#	disc1	disc2	disc3	disc4	disc5	disc6	disc7			avg	stdev
		sending	20.3137	8.681	10.0458	17.9167	13.5973	8.48067	9.84633			12.6974	4.39366
		receiving	8.73807	4.40356	2.97558	6.89994	5.81825	3.99319	6.1472			5.56797	1.80389
		genotype:+/+
		sample#	disc1	disc2	disc3	disc4	disc5	disc6	disc7			avg	stdev
		sending	37.1327	44.5487	32.97	37.9593	22.6807	26.6107	32.2013			33.4433	6.77834
		receiving	13.7611	13.2665	12.3028	12.6606	4.3982	8.32035	7.49665			10.3152	3.31599	0.0145259
		Genotype: wg>wgGFP
		sample#	disc1	disc2	disc3	disc4	disc5	disc6	disc7			avg	stdev	0.012446
		sending	59.731	83.0963	74.563	77.5957	74.7367	62.0943	49.005			68.6889	11.1431
		receiving	14.2461	15.6079	14.9926	15.247	13.3286	13.3515	14.1292			14.4147	0.834111
