# Supplementary material for: Regulated delivery controls Drosophila Hedgehog, Wingless, and Decapentaplegic signaling
Source: eLife journal article supplement (doi:10.7554/elife.71744), 2021-07-22
Supplement: supp [file elife-71744-supp-v1.zip › elife_poa_e71744_Figure_5_source_data_1.xlsx]

## Sheet: Sheet1
Figure 5C
	+			+,+			Hs,+,+			HL,+,+			HS,HL,+,+			hh>Hh:GFP			btl>ihog
	sample#	En distance (µm)		sample#	En distance (µm)		sample#	En distance (µm)		sample#	En distance (µm)		sample#	En distance (µm)		sample#	En distance (µm)		sample#	En distance (µm)
	disc1	89.908		disc1	91.566		disc1	96.066		disc1	101.163		disc1	92.601		disc1	107.653		disc1	147.641
	disc2	100.203		disc2	80.831		disc2	98.327		disc2	98.522		disc2	97.277		disc2	158.035		disc2	109.745
	disc3	93.034		disc3	96.412		disc3	96.061		disc3	86.027		disc3	100.066		disc3	104.736		disc3	128.862
	disc4	92.699		disc4	93.036		disc4	86.83		disc4	67.489		disc4	80.613		disc4	98.594		disc4	114.626
	disc5	93.846		disc5	78.692		disc5	77.902		disc5	73.103		disc5	88.123		disc5	128.031		disc5	122.752
	disc6	87.326		disc6	86.942					disc6	88.801		disc6	89.513		disc6	123.18		disc6	106.127
													disc7	99.933		disc7	157.087
																disc8	147.708
	avg	92.836		avg	87.9132		avg	91.0372		avg	85.8508		avg	92.5894		avg	131.053		avg	116.422
	stdev	3.96409		stdev	6.42841		stdev	7.66685		stdev	12.2707		stdev	6.59706		stdev	22.3622		stdev	8.35006
