# Supplementary material for: Regulated delivery controls Drosophila Hedgehog, Wingless, and Decapentaplegic signaling
Source: eLife journal article supplement (doi:10.7554/elife.71744), 2021-07-22
Supplement: supp [file elife-71744-supp-v1.zip › elife_poa_e71744_Figure_5_source_data_2.xlsx]

## Sheet: HS,HL,+,+
		ASP1	ASP2	ASP3	ASP4	ASP5	ASP6	avg	stdev
	# of cytonemes	85	73	101	74	64	54	75.1667	14.9601
	ASP perimeter (µm)	224.169	216.141	261.644	184.183	163.27	116.489	194.316	46.5907
	density	0.379178	0.337742	0.386021	0.401774	0.391989	0.463563	0.393378	0.0373038

## Sheet: +
		asp1	asp2	asp3	asp4	asp5	avg	stdev
	# of cytonemes	72	58	56	54	51	58.2	7.27736
	ASP perimeter (µm)	169.445	175.79	150.461	171.778	146.512	162.797	11.9252
	density	0.424917	0.329939	0.372189	0.314359	0.348094	0.3579	0.0386502

## Sheet: +,+
		ASP1	ASP2	ASP3	ASP4	ASP5	avg	stdev
	# of cytonemes	74	54	71	62	52	62.6	8.8
	ASP perimeter (µm)	169.449	168.933	190.887	194.705	139.557	172.706	19.6886
	density	0.43671	0.319653	0.371948	0.31843	0.372608	0.36387	0.0435134

## Sheet: HL,+,+
Figure 5E
		ASP1	ASP2	ASP3	ASP4	ASP5	avg	stdev
	# of cytonemes	51	61	64	60	61	62.6	4.40908
	ASP perimeter (µm)	158.878	157.904	152.835	161.708	151.184	172.706	3.91002
	density	0.321001	0.386311	0.418752	0.371039	0.403482	0.36387	0.0336276
