# Supplementary material for: Regulated delivery controls Drosophila Hedgehog, Wingless, and Decapentaplegic signaling
Source: eLife journal article supplement (doi:10.7554/elife.71744), 2021-07-22
Supplement: supp [file elife-71744-supp-v1.zip › elife_poa_e71744_Figure_6_source_data_1.xlsx]

## Sheet: wg-related
Figure 6B
	target gene	wg			target gene	notum
	genotype	wgrf/wg+	wg+/wg+		genotype	wgrf/wg+	wg+/wg+
	sample1	6.90378	5.75585		sample1	6.29653	6.68177
	sample2	6.71689	5.92162		sample2	5.82605	6.0909
	sample3	7.14992	6.16855		sample3	5.92513	6.00096
	sample4		5.58139
	avg	6.92353	5.85686		avg	6.0159	6.25788
	ttest	0.00493142			ttest	0.399909
	All values are delta Ct between experimental and actin.

## Sheet: dpp-related
	target gene	dpp			target gene	brk
	genotype	wt	4xdpp		genotype	wt	4xdpp		target gene	sog				target gene	pent				target gene	cv-2
		6.89099	5.78167			4.54596	4.55414		genotype	wt	4xdpp			genotype	wt	4xdpp			genotype	wt	4xdpp
		7.25504	6.40556			4.76913	4.3063			6.33111	6.40406				6.78723	6.34629				7.37516	7.05899
		7.20242	5.76632			4.76144	4.49068			6.11094	6.12733				6.94693	6.65886				7.37444	7.07234
		6.624	6.40499			4.51374	4.54771			6.42365	6.2106				6.84632	6.43861				7.16638	6.84904
	avg	6.99311	6.08964		avg	4.64757	4.47471			6.50759	6.73718				6.51907					7.09749
	stdev	0.254506	0.315688		ttest	0.101805			avg	6.34332	6.36979			avg	6.77489	6.48125			avg	7.25337	6.99346
	ttest	0.00837109							ttest	0.874185				ttest	0.0785016				ttest	0.0545624
	All values are delta Ct between experimental and actin.

## Sheet: hh-related
target gene	hh			target gene	shf
genotype	hhac	40khh/100khh		genotype	hhac	40khh/100khh
	5.929	4.66845			4.46896	4.61637
	6.06379	4.27191			4.33889	4.70246
	6.6904	4.82692			4.16728	4.22496
avg	6.22773	4.58909		avg	4.32504	4.51459
ttest	0.00464358			ttest	0.329679
		All values are delta Ct between experimental and actin.

## Sheet: summary
	dpp		brk		sog		pent		cv-2		wg		notum		hh		shf
	wt	4xdpp	wt	4xdpp	wt	4xdpp	wt	4xdpp	wt	4xdpp	wgRF	wt	wgRF	wt	hhac	4xhh	hhac	4xhh
ct	6.99311	6.08964	4.64757	4.47471	6.34332	6.36979	6.77489	6.48125	7.25337	6.99346	6.92353	5.85686	6.0159	6.25788	6.51478	4.45398	4.32504	4.51459
SD	0.254506	0.315688	0.118298	0.100317	0.147977	0.234668	0.206908	0.131118	0.12385	0.10226	0.177334	0.216468	0.202514	0.301979	0.307818	0.163212	0.12355	0.207799
ttest ( p value)	0.00837109		0.101805		0.874185		0.0785016		0.0545624		0.00201568		0.399909		0.000297093		0.329679
fold difference	1.87057		1.12729		1.01851		1.22572		1.19741		2.0946		1.18261		4.12161		1.14041
	dpp		brk		sog		pent		cv-2		wg		notum		hh		shf
